# Supplementary material
Source: PubMed Central journal article supplement (PMC3786371)

Sup. Fig. 1

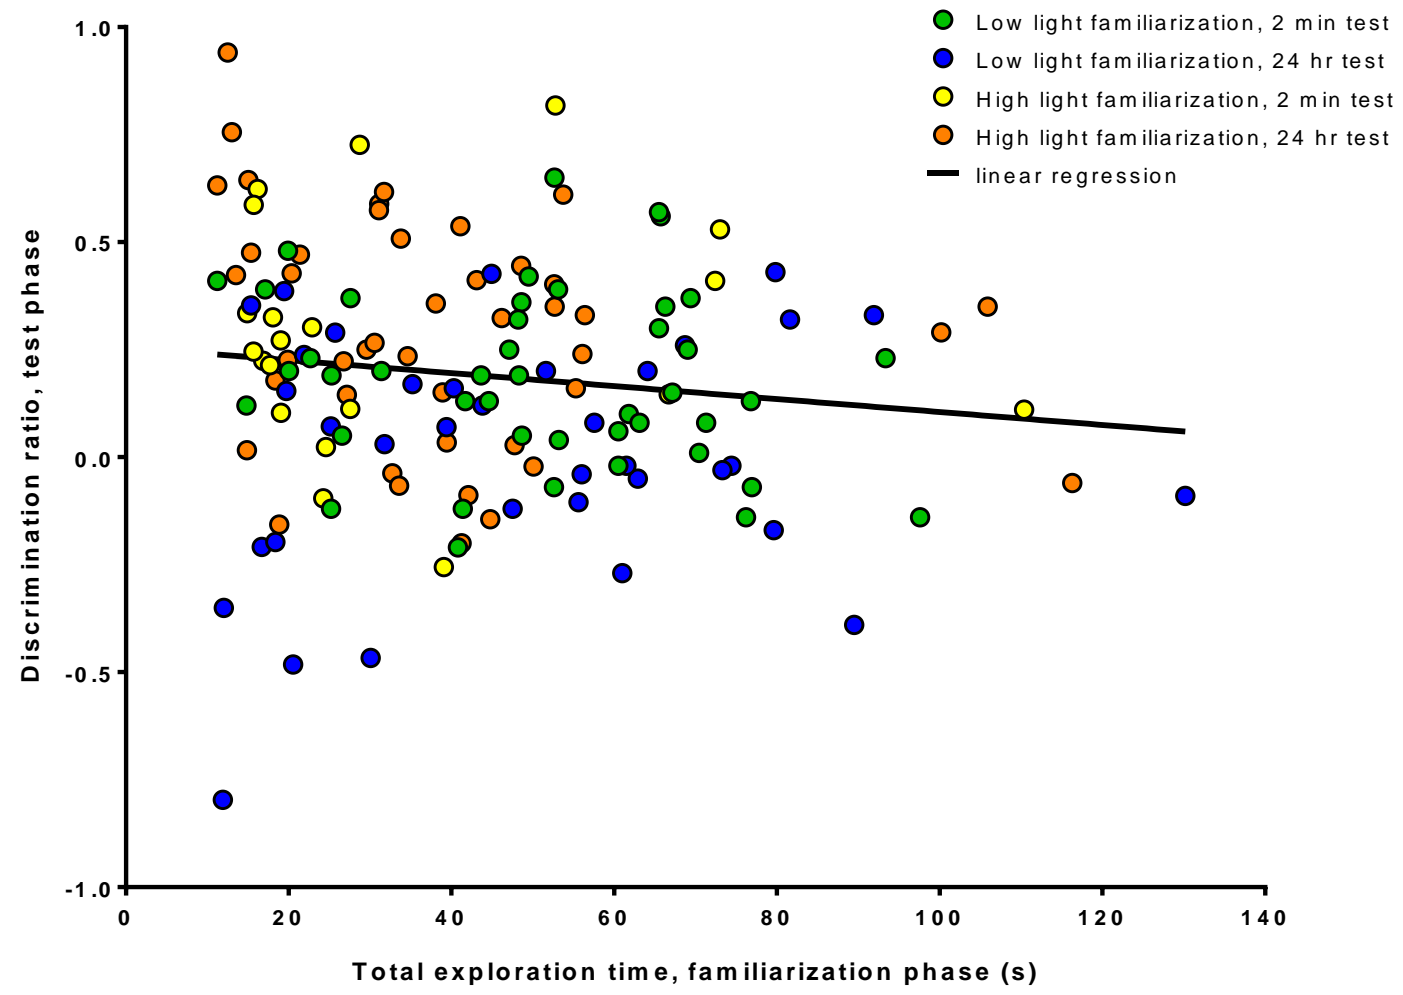

Sup. Fig. 2

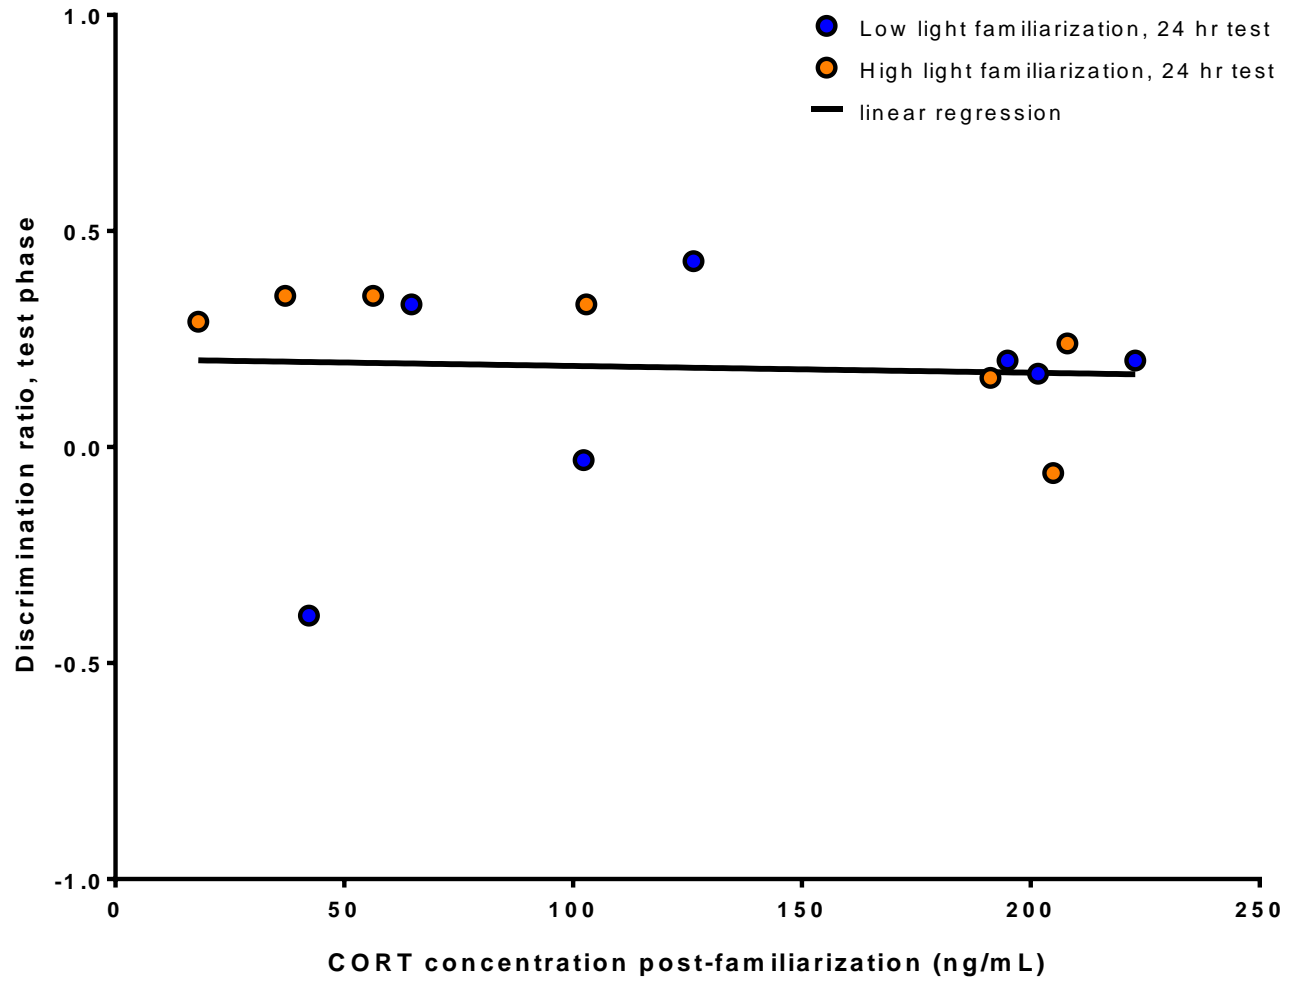

Supplement: NIHMS502981-supplement-01.pdf [file NIHMS502981-supplement-01.pdf]
